# Supplementary material
Source: Springer Nature journal article supplement (https://www.springerprofessional.de/resource/supplementary/13638_2011_558_MOESM1_ESM.pdf/11897626)

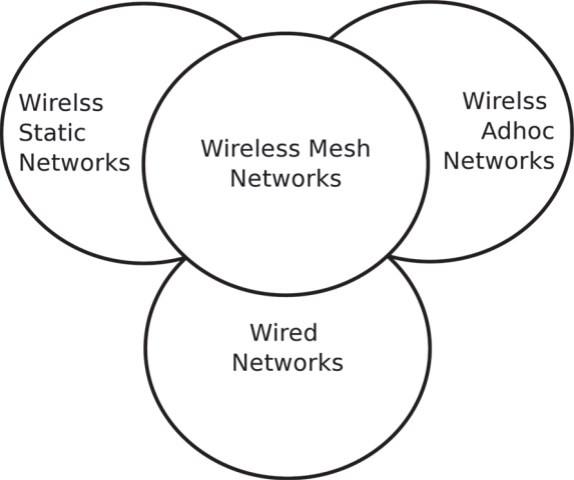

Wireless  
Static  
Networks

Wireless Mesh  
Networks

Wireless  
Adhoc  
Networks

Wired  
Networks

Supplement: MOESM1 [file 11897626]
